# Supplementary material for: Assessing the reactivity to mobile phones and repeated surveys on reported care-seeking for common childhood illnesses in rural India
Source: PubMed Central journal article supplement (PMC6150610; doi:10.7189/jogh.08.020807), 2018-12
Supplement: jogh-08-020807-s001.pdf [file jogh-08-020807-s001.pdf]

## Online Supplementary Document

Harish et al. Assessing the reactivity to mobile phones and repeated surveys on reported care-seeking for common childhood illnesses in rural India

J Glob Health 2018;8:020807

Supplementary table 1: Percent of children under 5 years of age with suspected illness and percent seeking treatment, by illness type (NFHS-3, 2005-2006)

|                                                 | Percent with suspected illness | Percent seeking treatment |
|-------------------------------------------------|--------------------------------|---------------------------|
| Symptoms of ARI (i.e. cough and fast breathing) | 6.7%                           | 72.4%                     |
| Symptoms of malaria (i.e. fever)                | 11.0%                          | 83.9%                     |
| Diarrhea                                        | 8.1%                           | 77.3%                     |

\*All indicators represent illness episodes and treatment occurring in the two weeks prior to the survey for children under 5 years of age.

We calculate the proportion of all children seeking care for a specific illness as the product of the two columns above. For example, we expect that 4.9% of all children will seek care for ARI in the two weeks before the survey ( $6.7\% \times 72.4\% = 4.9\%$ ). The combined prevalence of care-seeking for all three illness combined is as:

$$(6.7\% \times 72.4\%) + (11.0\% \times 83.9\%) + (8.1\% \times 77.3\%) = 20.3\%$$

In other words, for every 100 children interviewed we would expect 20.3 to report a care-seeking event.

Supplementary table 2: Sample size required for given levels of precision and proportion of care-seeking events that are confirmed

|           | Base Prevalence |     |     |     |
|-----------|-----------------|-----|-----|-----|
| Precision | 50%             | 70% | 75% | 80% |
| 5%        | 385             | 323 | 289 | 246 |
| 6%        | 267             | 225 | 201 | 171 |
| 7%        | 196             | 165 | 147 | 126 |
| 8%        | 151             | 127 | 113 | 97  |
| 9%        | 119             | 100 | 89  | 76  |
| 10%       | 97              | 81  | 73  | 62  |

Supplementary table 3: Number of mothers enrolled and followed up (by month) in the intervention (phone) and control groups

|         | Phone group (n=200) | Longitudinal Control Group (n=100) | Cross-sectional Control Group (n=449) |             |             |             |             |             |
|---------|---------------------|------------------------------------|---------------------------------------|-------------|-------------|-------------|-------------|-------------|
|         |                     |                                    | Grp1 (n=75)                           | Grp2 (n=75) | Grp3 (n=75) | Grp4 (n=74) | Grp5 (n=75) | Grp6 (n=75) |
| Month 1 | 191                 | 97                                 | 71                                    |             |             |             |             |             |
| Month 2 | 191                 | 95                                 |                                       | 70          |             |             |             |             |
| Month 3 | 183                 | 93                                 |                                       |             | 65          |             |             |             |
| Month 4 | 180                 | 87                                 |                                       |             |             | 66          |             |             |
| Month 5 | 174                 | 83                                 |                                       |             |             |             | 61          |             |
| Month 6 | 179                 | 80                                 |                                       |             |             |             |             | 60          |

Supplementary table 4: Episodes of diarrhoea, fever and pneumonia in under-5 children and care seeking for these by month during study period

|                                                                         | Month 1                          | Month 2                          | Month 3                         | Month 4                         | Month 5                        | Month 6                         |
|-------------------------------------------------------------------------|----------------------------------|----------------------------------|---------------------------------|---------------------------------|--------------------------------|---------------------------------|
| <b>Total episodes of diarrhoea (% [95%CI])</b>                          | 46/498<br>(9.2% [6.8, 12.1%])    | 18/498<br>(3.6% [2.2, 5.7%])     | 10/482<br>(2.1% [1.0, 3.8%])    | 15/490<br>(3.1% [1.7, 5.0%])    | 9/459<br>(2.0% [0.9, 3.7%])    | 35/466 (7.5% [5.3, 10.3%])      |
| <b>Episodes of diarrhoea seeking care (% [95%CI])<sup>1</sup></b>       | 33/45<br>(73.3% [58.1, 85.4%])   | 14/18<br>(77.8% [52.4, 93.6%])   | 7/9 (77.8 [40.0, 97.2%])        | 12/14<br>(85.7% [57.2, 98.2%])  | 5/9 (55.6% [21.2, 86.3%])      | 30/35 (85.7% [69.7, 95.2%])     |
| <b>Total episodes of fever (% [95%CI])</b>                              | 136/495<br>(27.5% [23.6, 31.6%]) | 112/495<br>(22.6% [19.0, 26.6%]) | 112/482<br>(23.2 [19.5, 27.3%]) | 89/490<br>(18.2% [14.8, 21.9%]) | 73/454<br>(16.1 [12.8, 19.8%]) | 84/463<br>(18.1% [14.7, 22.0%]) |
| <b>Episodes of fever seeking care (% [95%CI])<sup>2</sup></b>           | 105/133<br>(78.9% [71.0, 85.5%]) | 92/110<br>(83.6% [75.4, 90.0%])  | 91/110<br>(82.7% [74.3, 89.3%]) | 71/88<br>(80.7% [70.9, 88.3%])  | 59/72<br>(81.9% [71.1, 90.0%]) | 68/84<br>(81.0% [70.9, 88.7%])  |
| <b>Total episodes of fever and cough (% [95%CI])</b>                    | 80/473<br>(16.9% [13.6, 20.6%])  | 79/485<br>(16.3% [13.1, 19.9%])  | 74/479<br>(15.4% [12.3, 19.0%]) | 53/488<br>(10.9% [8.2, 14.0%])  | 48/451<br>(10.6% [8.0, 13.9%]) | 57/458<br>(12.4% [9.6, 15.8%])  |
| <b>Episodes of fever and cough seeking care (% [95%CI])<sup>3</sup></b> | 66/78<br>(84.6% [74.7, 91.8%])   | 67/78<br>(85.9% [76.2, 92.7%])   | 65/74<br>(87.8% [78.2, 94.3%])  | 47/53<br>(88.7% [77.0, 95.7%])  | 43/47<br>(91.5% [79.6, 97.6%]) | 50/57 (87.7% [76.3, 94.9%])     |

<sup>1</sup>  $\chi^2$  test: p=0.47

<sup>2</sup>  $\chi^2$  test: p=0.95

<sup>3</sup>  $\chi^2$  test: p=0.90
